# Supplementary material for: Associations of environment, health history, T‐zone lymphoma, and T‐zone‐like cells of undetermined significance: A case‐control study of aged Golden Retrievers
Source: PubMed Central journal article supplement — J Vet Intern Med. 2019 Jan 21;33(2):764–75. doi: 10.1111/jvim.15405 (PMC6430877; doi:10.1111/jvim.15405), 2019-01-21
Supplement: JVIM-33-764-s001.pdf [file JVIM-33-764-s001.pdf]

**Suppl. Table 1. Antibody panels used for immunophenotyping.**

**Tube Antibody specificity and fluorochrome**

- 1 M\* IgG1-FITC / M IgG1-PE / M IgG1-Alexa 647 / M IgG1-Alexa 700 / M IgG1-PE-750 / M IgG1-Pacific Blue
- 2 CD3-FITC / CD25-PE / CD5-APC / CD8-Alexa 700 / CD4-Pacific Blue
- 3 Class II MHC-FITC / CD22-PE / CD21-Alexa 647
- 4 Class II MHC-FITC / CD34-PE / CD5-APC / CD14-PE-Alexa 750
- 5 Class II MHC-FITC / CD18-PE / CD5-APC / CD14 PE-Alexa 750 / CD4-Pacific Blue
- 6 CD5-FITC / CD45-PE / CD21-Alexa 647

\*M = mouse

Unless otherwise noted, all antibodies were purchased from Bio-Rad.

Clones are as follows: CD45 = YKIX716.13, CD18 = YFC118.3 (human CD18), CD4 = YKIX302.9, CD8 = YCATE 55.9, CD5 = YKIX322.3, CD21 = CA2.1D6, CD22 = RFB4 (human CD22, purchased from AbCam), CD3 = CA17.2A12, CD14 = TUK4 (human), class II MHC = YKIX334.2, CD34 =

**Suppl. Table 2. Modeling results for case vs. control sensitivity analyses.** *Final model* indicates the model reported as our main results (n=140 cases, n=147 controls). *Age sensitivity analysis* removed 20 cases that were <9 years of age (n=120 cases, n=147 controls). *Cancer sensitivity analysis* removed both cases and controls with a history of or concurrent non-lymphoma cancer (n=119 cases, n=111 controls). % change indicates the percent change in the OR estimate compared to the final model.

|                                      |                       | Final model |               |               |               | Age sensitivity analysis |               |               |               |          | Cancer sensitivity analysis |               |               |               |          |
|--------------------------------------|-----------------------|-------------|---------------|---------------|---------------|--------------------------|---------------|---------------|---------------|----------|-----------------------------|---------------|---------------|---------------|----------|
|                                      |                       | OR          | (95% CI)      | Indiv p-value | Type3 p-value | OR                       | (95% CI)      | Indiv p-value | Type3 p-value | % change | OR                          | (95% CI)      | Indiv p-value | Type3 p-value | % change |
| Age at spay/neuter (vs. Female <1yr) | Female >1yr           | 0.34        | (0.16 - 0.74) | 0.007         |               | 0.39                     | (0.17 - 0.85) | 0.018         |               | 12%      | 0.39                        | (0.17 - 0.90) | 0.028         |               | 12%      |
|                                      | Male <1yr             | 0.62        | (0.3 - 1.3)   | 0.206         |               | 0.65                     | (0.30 - 1.40) | 0.274         |               | 5%       | 0.74                        | (0.32 - 1.70) | 0.474         |               | 19%      |
|                                      | Male >1yr             | 0.93        | (0.4 - 2.16)  | 0.862         |               | 0.91                     | (0.37 - 2.22) | 0.827         |               | 2%       | 0.84                        | (0.33 - 2.11) | 0.704         |               | 10%      |
|                                      | Missing               | 1.44        | (0.46 - 4.46) | 0.530         | 0.031         | 1.72                     | (0.55 - 5.42) | 0.352         | 0.054         | 20%      | 1.26                        | (0.36 - 4.43) | 0.723         | 0.175         | 13%      |
| DHPP                                 | As directed (vs. not) | 3.21        | (1.58 - 6.51) | 0.001         | 0.001         | 3.03                     | (1.47 - 6.24) | 0.003         | 0.003         | 6%       | 3.45                        | (1.58 - 7.55) | 0.002         | 0.002         | 8%       |
| Bladder infection                    | Yes (vs. no)          | 3.49        | 0.96 - 12.67  | 0.057         | 0.057         | 2.95                     | 0.77 - 11.35  | 0.116         | 0.116         | 16%      | 2.94                        | 0.64 - 13.36  | 0.164         | 0.164         | 16%      |
| Mange                                | Yes (vs. no)          | 5.50        | (1.44 - 21.1) | 0.013         | 0.013         | 5.78                     | 1.49 - 22.39  | 0.011         | 0.011         | 5%       | 11.52                       | 1.36 - 97.29  | 0.025         | 0.025         | 109%     |
| Eye disease                          | Yes (vs. no)          | 2.25        | (0.97 - 5.22) | 0.059         | 0.059         | 2.49                     | (1.06 - 5.88) | 0.037         | 0.037         | 11%      | 1.52                        | (0.58 - 3.94) | 0.394         | 0.394         | 33%      |
| Gastrointestinal disease             | Yes (vs. no)          | 2.38        | (0.98 - 5.76) | 0.055         | 0.055         | 2.20                     | (0.90 - 5.40) | 0.085         | 0.085         | 7%       | 3.30                        | (1.13 - 9.65) | 0.030         | 0.030         | 39%      |
| Hypothyroidism                       | Yes (vs. no)          | 0.25        | (0.1 - 0.66)  | 0.005         | 0.005         | 0.27                     | (0.10 - 0.74) | 0.011         | 0.011         | 8%       | 0.40                        | (0.14 - 1.15) | 0.089         | 0.089         | 60%      |
| Omega-3 supplements (vs              | Yes                   | 0.29        | (0.13 - 0.63) | 0.002         | 0.007         | 0.27                     | (0.12 - 0.62) | 0.002         |               | 6%       | 0.32                        | (0.14 - 0.79) | 0.012         | 0.026         | 12%      |
|                                      | Missing               | 0.88        | (0.44 - 1.73) | 0.704         |               | 0.94                     | (0.47 - 1.88) | 0.857         |               | 7%       | 1.20                        | (0.56 - 2.56) | 0.643         |               | 37%      |

**Suppl. Table 3. Modeling results for TZUS vs. control sensitivity analysis.** *Final model* indicates the model reported as our main results (n=221 TZUS, n=147 controls). *Cancer sensitivity analysis* removed both TZUS and controls with a history of or concurrent non-lymphoma cancer (n=166 TZUS, n=111 controls). % change indicates the percent change in the OR estimate compared to the final model.

|                                         |              | Final model |               |                  |                  | Cancer sensitivity analysis |                |                  |                  |             |
|-----------------------------------------|--------------|-------------|---------------|------------------|------------------|-----------------------------|----------------|------------------|------------------|-------------|
|                                         |              | OR          | (95% CI)      | Indiv<br>p-value | Type3<br>p-value | OR                          | (95% CI)       | Indiv<br>p-value | Type3<br>p-value | %<br>change |
| Age at spay/neuter<br>(vs. Female <1yr) | Female >1yr  | 1.07        | (0.59 - 1.95) | 0.831            | 0.050            | 1.42                        | (0.71 - 2.87)  | 0.325            |                  | 33%         |
|                                         | Male <1yr    | 0.82        | (0.42 - 1.6)  | 0.566            |                  | 0.91                        | (0.40 - 2.05)  | 0.815            |                  | 10%         |
|                                         | Male >1yr    | 2.22        | (1.13 - 4.37) | 0.021            |                  | 2.32                        | (1.07 - 5.03)  | 0.034            |                  | 4%          |
|                                         | Missing      | 1.16        | (0.37 - 3.68) | 0.800            |                  | 1.39                        | (0.38 - 5.05)  | 0.615            | 0.142            | 20%         |
| Bladder infection                       | Yes (vs. no) | 5.10        | (1.9 - 13.69) | 0.001            | 0.001            | 5.39                        | (1.52 - 19.05) | 0.009            | 0.009            | 6%          |
| Eye disease                             | Yes (vs. no) | 1.92        | (0.99 - 3.75) | 0.056            | 0.001            | 2.10                        | (0.98 - 4.48)  | 0.056            | 0.056            | 9%          |

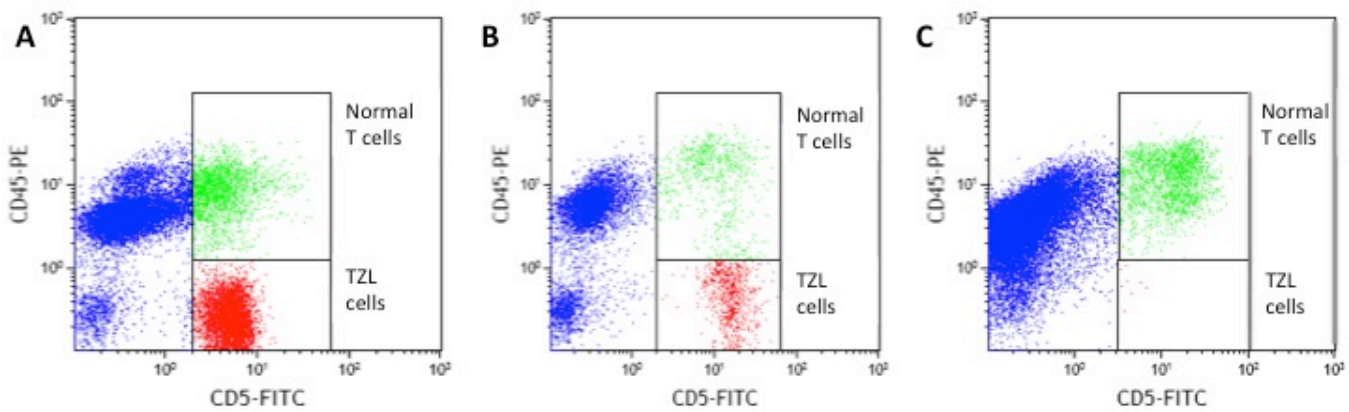

**Suppl. Fig 1. Flow cytometric analysis of peripheral blood samples.** (A) Sample considered diagnostic for TZL due to homogeneous expansion of CD5<sup>+</sup>CD45<sup>-</sup> T cells (red cells; TZL). (B) Sample diagnosed as TZUS due to smaller population of CD5<sup>+</sup>CD45<sup>-</sup> T cells and absence of lymphocytosis or lymphadenopathy. (C) Sample considered a control; all T cells are CD5<sup>+</sup>CD45<sup>+</sup> (green cells; normal)

**Suppl. Figure 2. Collapsing of variables from questionnaire for use in analysis.** \*Age at diagnosis was captured using the following categories: “<1 year”, “1-3 years”, “4-6 years”, “7-10 years”, “Over 10 years”, and “Diagnosed with this condition, but can’t remember age”.

### A. Signalment

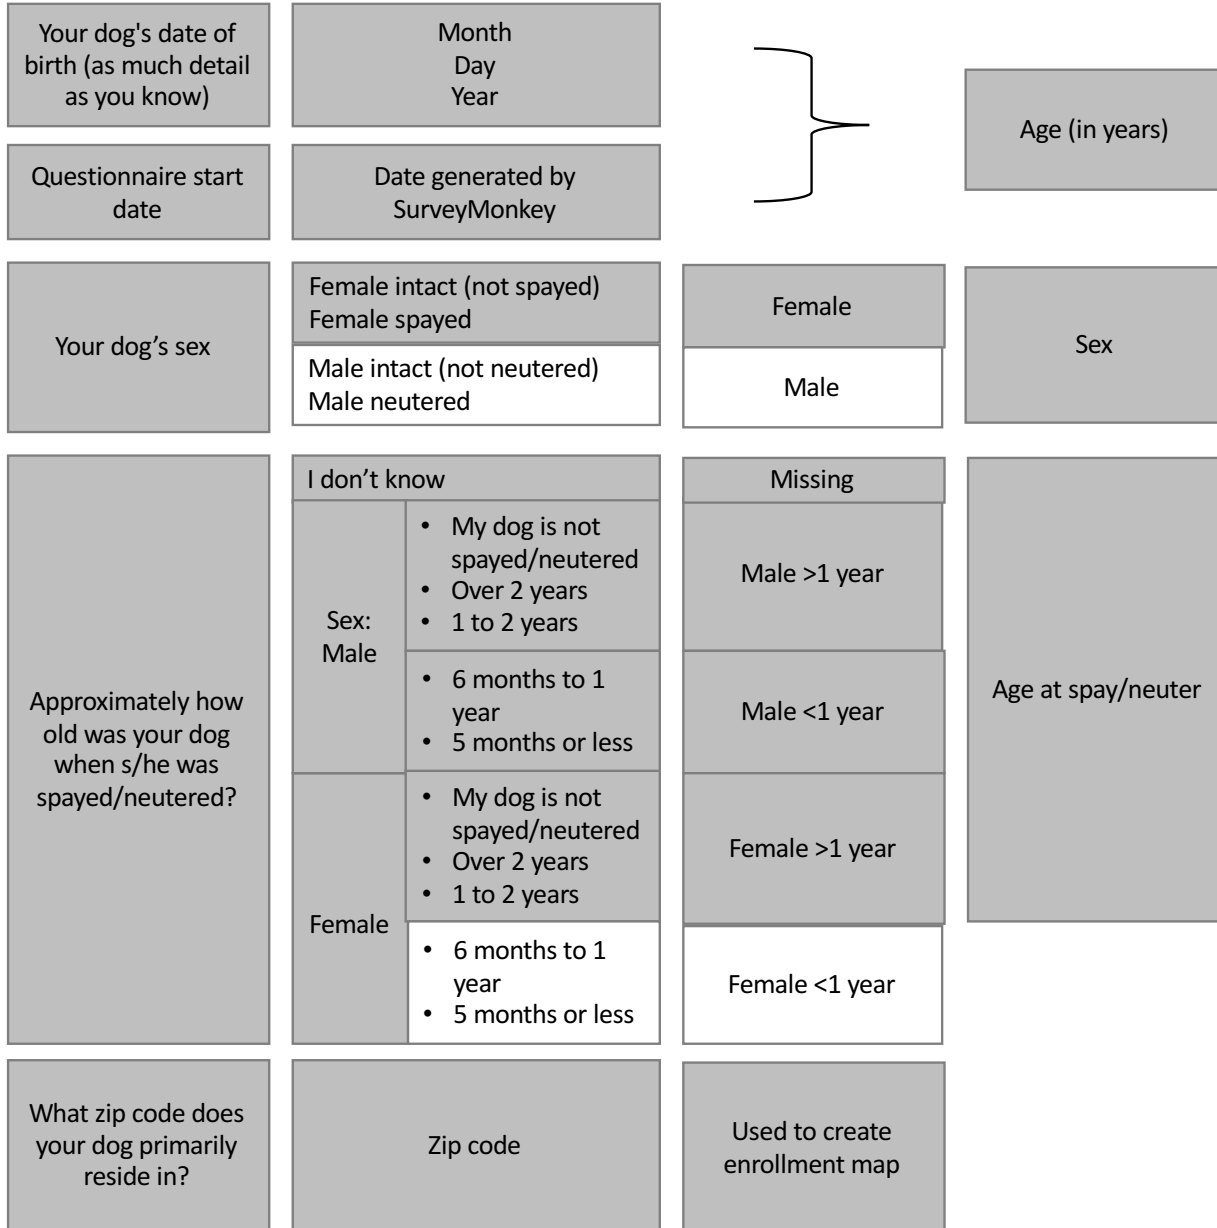

## B. Preventive care

|                                                                                                                                                                                                                                                                          |                                                                                                                                                                         |                                           |                                                                                                                                |
|--------------------------------------------------------------------------------------------------------------------------------------------------------------------------------------------------------------------------------------------------------------------------|-------------------------------------------------------------------------------------------------------------------------------------------------------------------------|-------------------------------------------|--------------------------------------------------------------------------------------------------------------------------------|
| <p>How often does your dog use:</p> <ul style="list-style-type: none"> <li>Flea preventive treatments</li> <li>Heartworm preventive treatments</li> </ul>                                                                                                                | <p>Monthly<br/>Seasonally<br/>Sporadically</p> <p>Never</p>                                                                                                             | <p>Ever</p> <p>Never</p>                  | <p>Flea preventives<br/>Heartworm preventives</p>                                                                              |
| <p>Have you ever found a tick on your dog?</p>                                                                                                                                                                                                                           | <p>Yes, once<br/>Yes, multiple times</p> <p>No</p>                                                                                                                      | <p>Yes</p> <p>No</p>                      | <p>Tick ever</p>                                                                                                               |
| <p>Has your dog ever been diagnosed with:</p>                                                                                                                                                                                                                            | <p>No</p> <p>Yes</p> <p>↳</p> <ul style="list-style-type: none"> <li>Gum disease</li> <li>Tooth disease (including tooth loss)</li> <li>Other dental disease</li> </ul> | <p>Tooth or gum disease</p>               |                                                                                                                                |
| <p>How many times has your dog had its teeth cleaned by a veterinarian?</p>                                                                                                                                                                                              | <p>5 or more times<br/>3-4 times<br/>1-2 times</p> <p>Never</p>                                                                                                         | <p>Ever</p> <p>Never</p>                  | <p>Teeth cleaned</p>                                                                                                           |
| <p>How often does your dog receive the following vaccinations?</p> <ul style="list-style-type: none"> <li>Rabies</li> <li>Distemper-Parvovirus combination vaccine</li> <li>Kennel cough (Bordetella)</li> <li>Other (incl. Leptospirosis, Lyme, rattlesnake)</li> </ul> | <p>Every 6 months<br/>Yearly<br/>Every 3 years</p> <p>Less frequently than every 3 years<br/>Never</p>                                                                  | <p>As directed</p> <p>Not as directed</p> | <ul style="list-style-type: none"> <li>Rabies</li> <li>Distemper-Parvovirus combination vaccine</li> <li>Bordetella</li> </ul> |
| <p>Has your dog ever had a vaccine reaction (e.g. swelling of the face, paws, or had to return to the veterinarian for treatment after a vaccine)?</p>                                                                                                                   | <p>Yes</p> <p>No</p>                                                                                                                                                    | <p>Yes</p> <p>No</p>                      | <p>Vaccine reaction</p>                                                                                                        |

## C. Health history

|                                                                                                                                      |                                                                                                                                                                                                                                                                                                                                                                                            |                                                        |
|--------------------------------------------------------------------------------------------------------------------------------------|--------------------------------------------------------------------------------------------------------------------------------------------------------------------------------------------------------------------------------------------------------------------------------------------------------------------------------------------------------------------------------------------|--------------------------------------------------------|
| <p>Has your dog ever been diagnosed with <b>cancer</b>?</p>                                                                          | <p>No</p> <p>Yes*</p> <ul style="list-style-type: none"> <li>Breast or mammary cancer</li> <li>Hemangiosarcoma</li> <li>Histocytoma</li> <li>Mast cell tumor</li> <li>Melanoma</li> <li>Osteosarcoma</li> <li>Squamous cell carcinoma</li> <li>Transitional cell carcinoma</li> <li>Other cancer</li> <li>Lymphoma/leukemia</li> </ul>                                                     | <p>Non-lymphoma cancer</p>                             |
| <p>Has your dog ever been diagnosed with <b>an eye, ear, nose, or throat</b> condition (e.g. ear infection, uveitis, cataracts)?</p> | <p>No</p> <p>Yes*</p> <ul style="list-style-type: none"> <li>Cataracts</li> <li>Glaucoma</li> <li>Progressive retinal atrophy or degeneration</li> <li>Sudden onset blindness</li> <li>Uveitis</li> <li>Ear infection (Otitis externa)</li> <li>Other ear, nose, throat, or eye condition</li> </ul>                                                                                       | <p>Eye disease</p> <p>Uveitis</p> <p>Ear infection</p> |
| <p>Has your dog ever been diagnosed with an <b>infectious</b> disease (e.g. worms, parvovirus, ehrlichiosis, kennel cough)?</p>      | <p>No</p> <p>Yes*</p> <ul style="list-style-type: none"> <li>Worms (e.g. heartworm, tapeworm)</li> <li>Giardia</li> <li>Intestinal disease suspected to be infectious</li> <li>Kennel cough (tracheobronchitis)</li> <li>Leptospirosis</li> <li>Parvovirus</li> <li>Tick-born disease (e.g. Ehrlichiosis, Lyme, Rocky Mountain Spotted Fever)</li> <li>Other infectious disease</li> </ul> | <p>Worms</p> <p>Other infectious disease</p>           |
| <p>Has your dog ever been diagnosed with a <b>skin</b> condition (e.g. itchy skin, allergies, skin infection, mange)?</p>            | <p>No</p> <p>Yes*</p> <ul style="list-style-type: none"> <li>Mange, scabies, or mites</li> <li>Hot spots</li> <li>Itchy skin/allergies</li> <li>Pyoderma (skin infection)</li> <li>Other skin condition</li> </ul>                                                                                                                                                                         | <p>Mange</p> <p>Other skin disease</p>                 |

|                                                                                                                                                    |                                                                                                                                                                                                                                                                                                                                                                       |                                                                |
|----------------------------------------------------------------------------------------------------------------------------------------------------|-----------------------------------------------------------------------------------------------------------------------------------------------------------------------------------------------------------------------------------------------------------------------------------------------------------------------------------------------------------------------|----------------------------------------------------------------|
| <p>Has your dog ever been diagnosed with a <b>gastrointestinal</b> condition (e.g. chronic diarrhea, colitis)?</p>                                 | <p>No</p> <p>Yes*</p> <p>↳</p> <ul style="list-style-type: none"> <li>• Chronic colitis</li> <li>• Chronic diarrhea</li> <li>• Gastritis</li> <li>• Other gastrointestinal condition</li> </ul>                                                                                                                                                                       | <p>Gastrointestinal disease</p>                                |
| <p>Has your dog ever been diagnosed with an <b>orthopedic or neurologic</b> condition (e.g. hip dysplasia, osteoarthritis, patellar luxation)?</p> | <p>No</p> <p>Yes*</p> <p>↳</p> <ul style="list-style-type: none"> <li>• Elbow dysplasia</li> <li>• Hip dysplasia</li> <li>• Intervertebral disc disease</li> <li>• Osteoarthritis</li> <li>• Cruciate ligament rupture</li> <li>• Patellar luxation ('trick knee')</li> <li>• Seizures</li> <li>• Other musculoskeletal/orthopedic or neurologic condition</li> </ul> | <p>Degenerative joint disease</p> <p>Cruciate lig. rupture</p> |
| <p>Has your dog ever been diagnosed with a <b>urinary or reproductive</b> condition?</p>                                                           | <p>No</p> <p>Yes*</p> <p>↳</p> <ul style="list-style-type: none"> <li>• Bladder infection or stones</li> <li>• Kidney infection or stones</li> <li>• Kidney failure</li> <li>• Prostate infection or enlargement</li> <li>• Pyometra (uterine infection)</li> <li>• Other urinary or reproductive condition</li> </ul>                                                | <p>Bladder infection</p>                                       |
| <p>Has your dog ever been diagnosed with an <b>endocrine</b> condition (e.g. hypothyroidism, diabetes, Cushing's disease, Addison's disease)?</p>  | <p>No</p> <p>Yes*</p> <p>↳</p> <ul style="list-style-type: none"> <li>• Hypothyroidism</li> <li>• Addison's disease (hypoadrenocorticism)</li> <li>• Cushing's disease (hyperadrenocorticism)</li> <li>• Diabetes</li> <li>• Other endocrine or hormonal condition</li> </ul>                                                                                         | <p>Hypothyroidism</p> <p>Other endocrine disorder</p>          |
| <p>Has your dog ever been diagnosed with a <b>cardiovascular or blood</b> condition (e.g. cardiomyopathy, arrhythmia, thrombocytopenia)?</p>       | <p>No</p> <p>Yes*</p> <p>↳</p> <ul style="list-style-type: none"> <li>• Cardiomyopathy</li> <li>• Heart failure</li> <li>• Heart murmur or arrhythmia</li> <li>• Thrombocytopenia</li> <li>• Other cardiovascular or blood condition</li> </ul>                                                                                                                       | <p>Cardiovascular</p>                                          |

## D. Medications, environmental exposures, and diet

|                                                                                                                                                                                                                                                                                                                                                                                                                                                                 |                                                                                                                                                   |                                   |                                                                                                        |
|-----------------------------------------------------------------------------------------------------------------------------------------------------------------------------------------------------------------------------------------------------------------------------------------------------------------------------------------------------------------------------------------------------------------------------------------------------------------|---------------------------------------------------------------------------------------------------------------------------------------------------|-----------------------------------|--------------------------------------------------------------------------------------------------------|
| <p>Other than for treatment of cancer, has your dog ever taken any of the following medications?</p> <ul style="list-style-type: none"> <li>• Antihistamines (e.g. Diphenhydramine/Benadryl, Chlorpheniramine, hydroxyzine/atarax)</li> <li>• Anti-inflammatories (e.g. Aspirin, Rimadyl, Previcox)</li> <li>• Steroids (e.g. Prednisone, Dexamethasone)</li> <li>• Antibiotics</li> <li>• Oral immunosuppressants (e.g. azathioprine, cyclosporine)</li> </ul> | <p>One course<br/>Multiple courses<br/>Continuous use</p> <p>Never</p>                                                                            | <p>Ever</p> <p>Never</p>          | <p>Antihistamines<br/>Anti-inflammatories<br/>Steroids<br/>Antibiotics<br/>Oral immunosuppressants</p> |
| <ul style="list-style-type: none"> <li>• Non-prescription supplements or alternative therapies</li> <li>• Other medication, including topical</li> </ul>                                                                                                                                                                                                                                                                                                        | <p>Text box indicating supplement/other medication type</p>                                                                                       | <p>Ever</p> <p>Never</p>          | <p>Omega-3 supplements<br/>Other supplements</p>                                                       |
| <p>On average, how much time does your dog spend on <b>your lawn</b> at home?</p>                                                                                                                                                                                                                                                                                                                                                                               | <p>Over 18 hours per day<br/>13-18 hours per day<br/>6 -12 hours per day<br/>1-5 hours per day</p> <p>&lt;1 hour per day<br/>Never</p>            | <p>Frequent</p> <p>Infrequent</p> | <p>Lawn exposure</p>                                                                                   |
| <p>On average, how much time does your dog spend in the following areas?</p> <ul style="list-style-type: none"> <li>• Rural environments?</li> <li>• Parks or other public grassy spaces?</li> </ul>                                                                                                                                                                                                                                                            | <p>Daily<br/>Weekly<br/>Monthly</p> <p>Occasionally<br/>Never</p>                                                                                 | <p>Frequent</p> <p>Infrequent</p> | <p>Rural environment<br/>Parks</p>                                                                     |
| <p>On average, how often is your dog exposed to:</p> <ul style="list-style-type: none"> <li>• Lawn chemicals</li> <li>• Cigarette smoke</li> <li>• Paints, solvents, cleaning fluids, etc.?</li> </ul>                                                                                                                                                                                                                                                          | <p>Daily<br/>Weekly<br/>Monthly</p> <p>Occasionally<br/>Never</p>                                                                                 | <p>Frequent</p> <p>Infrequent</p> | <p>Lawn chemicals<br/>Cigarette smoke<br/>Other chemicals</p>                                          |
| <p>On average, how often does your dog swim in the following areas?</p> <ul style="list-style-type: none"> <li>• Ocean</li> <li>• Irrigation ditches, ponds, or canals</li> <li>• Lakes or streams</li> </ul>                                                                                                                                                                                                                                                   | <p>Daily<br/>Weekly<br/>Monthly</p> <p>Occasionally<br/>Never</p>                                                                                 | <p>Frequent</p> <p>Infrequent</p> | <p>Ocean<br/>Irrigation water<br/>Lakes/streams</p>                                                    |
| <p>What kind of food comprises the majority of your dog's diet?</p>                                                                                                                                                                                                                                                                                                                                                                                             | <p>Commercial dry food (kibble)<br/>Commercial canned food<br/>Commercial "fresh" or frozen food<br/>Home prepared food – cooked<br/>Raw diet</p> |                                   |                                                                                                        |
