# Supplementary material for: Associations of environment, health history, T‐zone lymphoma, and T‐zone‐like cells of undetermined significance: A case‐control study of aged Golden Retrievers
Source: PubMed Central journal article supplement — J Vet Intern Med. 2019 Jan 21;33(2):764–75. doi: 10.1111/jvim.15405 (PMC6430877; doi:10.1111/jvim.15405), 2019-01-21
Supplement: JVIM-33-764-s002.pdf [file JVIM-33-764-s002.pdf]

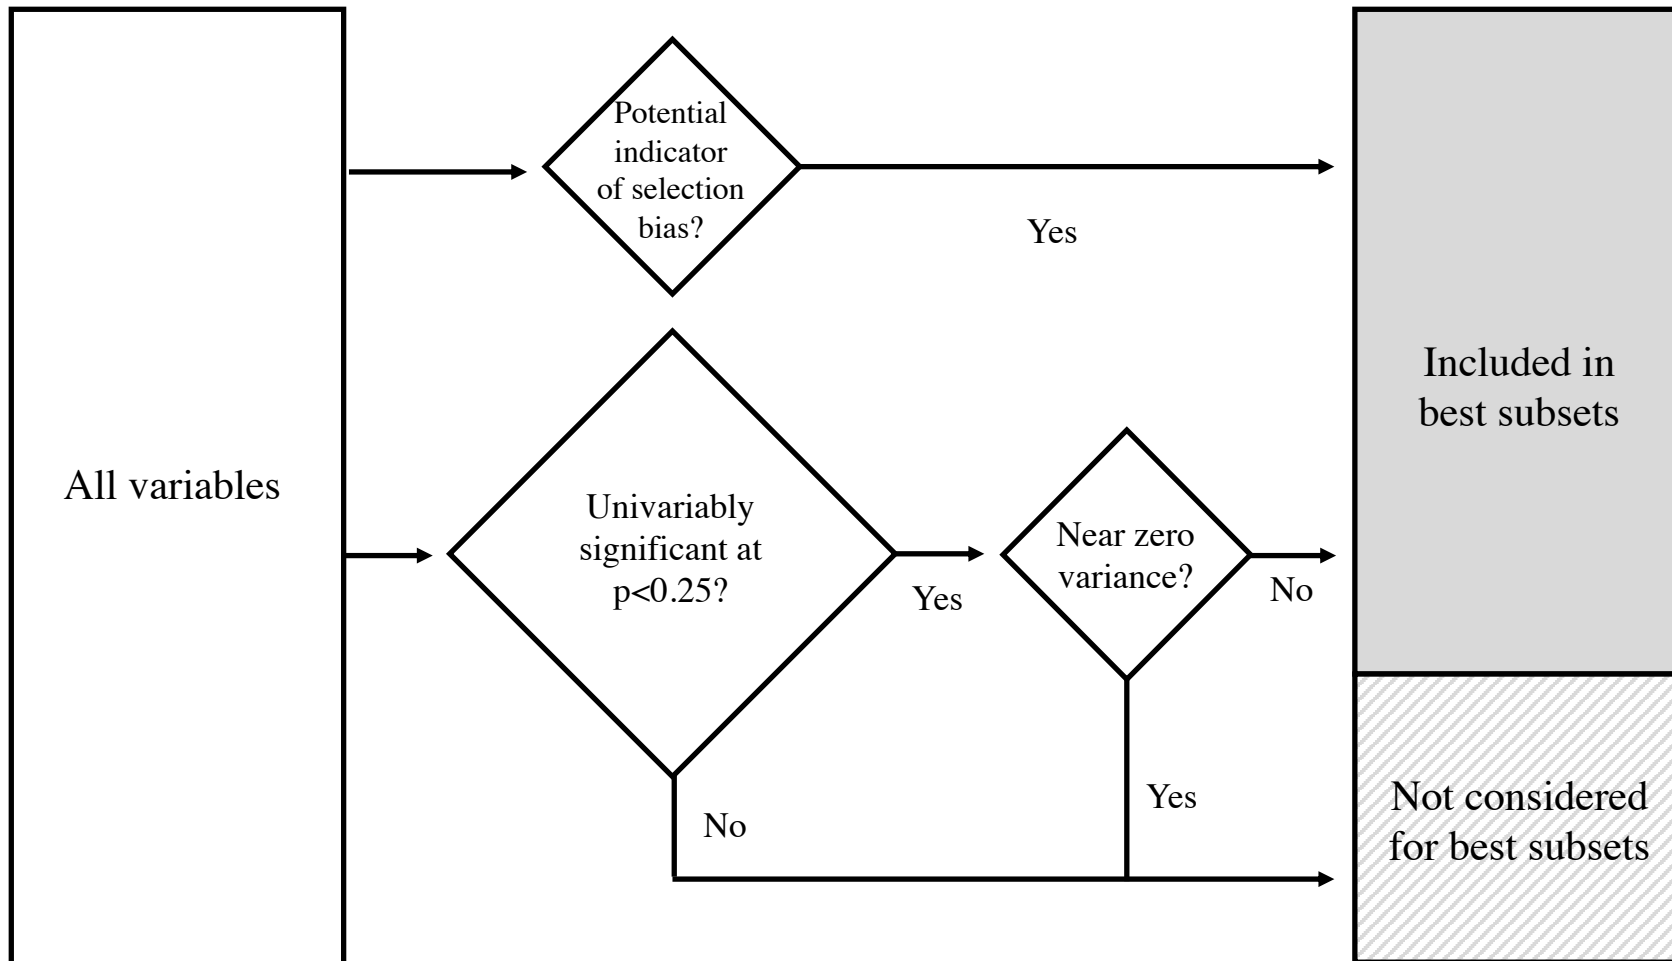

Suppl. Figure 3. Flow chart of variable selection for multivariable modeling. All variables selected to be included in best subsets were evaluated for collinearity before proceeding with best subsets regression.
